# Supplementary material for: Conceptual-level workflow modeling of scientific experiments using NMR as a case study
Source: Springer Nature journal article supplement (doi:10.1186/1471-2105-8-31), 2007-01-30

Conduct Bio-Molecular  
Analysis Using NMR  
Spectroscopy

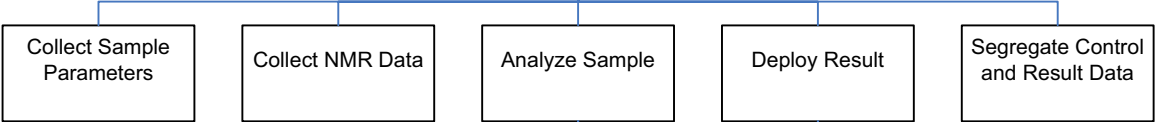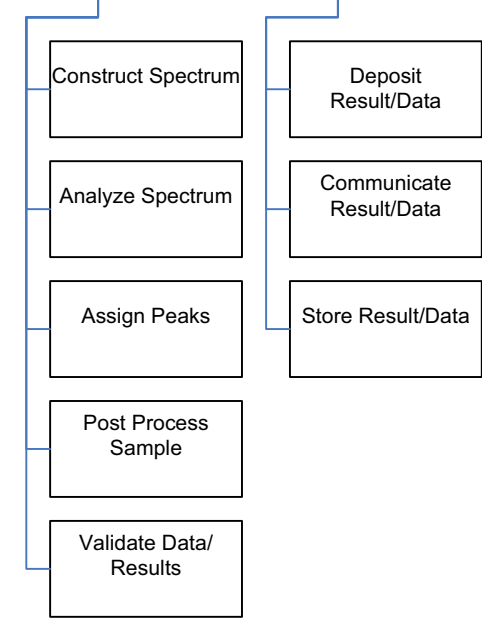

Supplement: 12859_2006_1403_MOESM2_ESM.pdf [file 12859_2006_1403_MOESM2_ESM.pdf]
